# Supplementary material for: Pparg signaling controls bladder cancer subtype and immune exclusion
Source: PubMed Central journal article supplement (PMC8545976; doi:10.1038/s41467-021-26421-6), 2021-10-25
Supplement: 41467_2021_26421_MOESM1_ESM.pdf [file 41467_2021_26421_MOESM1_ESM.pdf]

*Pparg* signalling controls bladder cancer subtype and drives immune exclusion

Tate, et al.

Supplementary Fig. 1

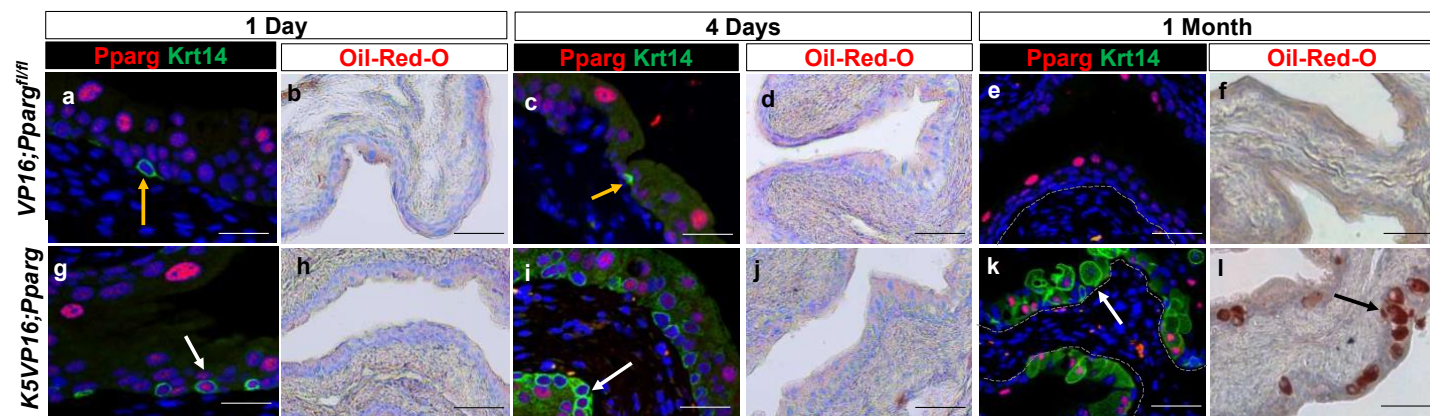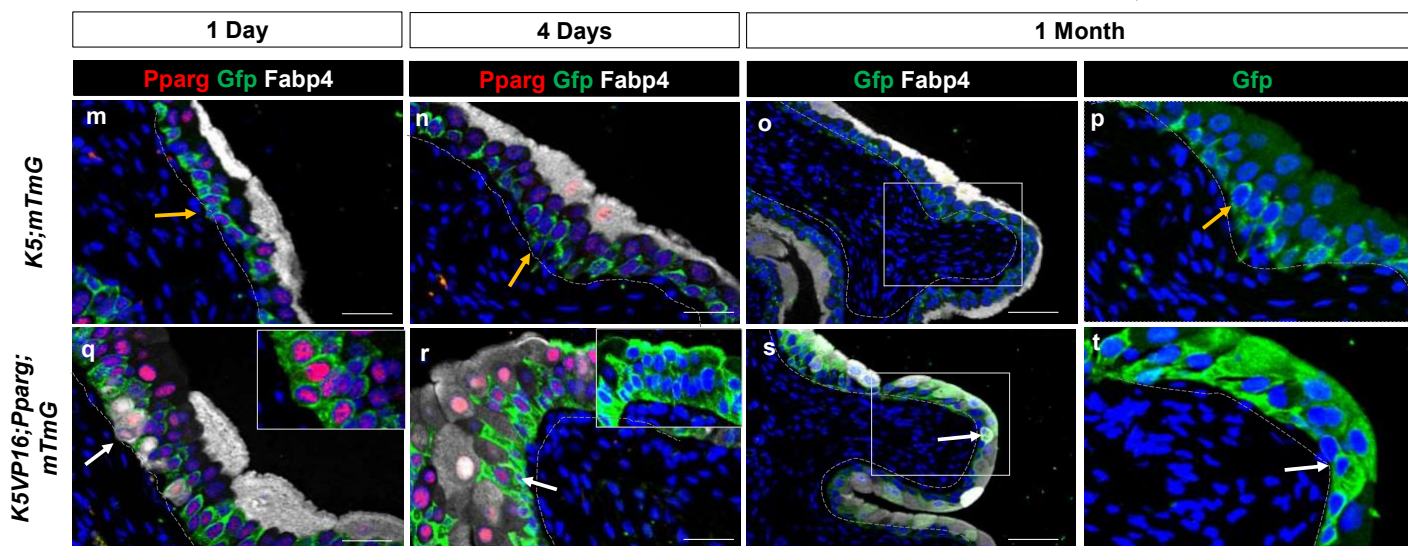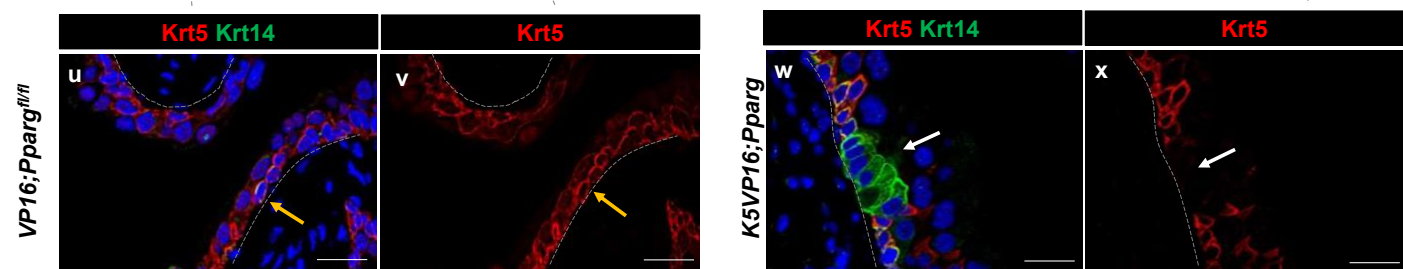

y

|                 | Gene   | FC       | Pvalue   |
|-----------------|--------|----------|----------|
| Luminal Markers | Upk1a  | 1.273411 | 0.101058 |
|                 | Upk1b  | 1.771737 | 0.004768 |
|                 | Upk2   | 1.831418 | 0.001319 |
|                 | Upk3b  | 1.472945 | 0.021860 |
|                 | Krt19  | 1.329701 | 0.041765 |
|                 | Krt20  | 3.083968 | 2.04E-07 |
|                 | Krt8   | 1.726677 | 0.000156 |
|                 | Xbp1   | 1.424798 | 0.012264 |
|                 | Cd24   | 1.618554 | 0.011801 |
|                 | Snx31  | 1.57461  | 0.01846  |
|                 | Fabp4  | 17.43987 | 2.90E-35 |
|                 | Cldn8  | 1.370199 | 0.010296 |
| Basal Markers   | Krt5   | 0.829999 | 0.208742 |
|                 | Col17a | 0.303966 | 1.64E-10 |
|                 | Trp63  | 0.579855 | 9.94E-07 |

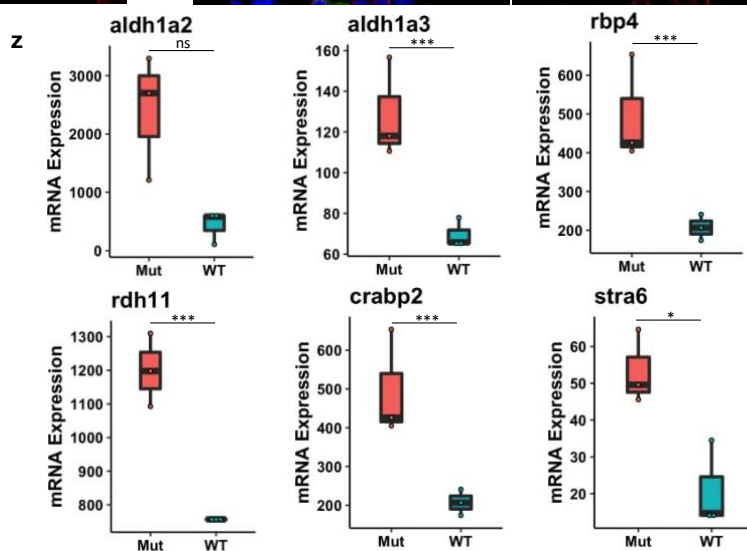

**Supplementary Fig. 1. (a-l)** Lipid droplet formation one month after Tamoxifen induction in *VP16;Pparg<sup>fl/fl</sup>* mutants. Pparg and Krt14 expression 1 day after Tamoxifen induction in controls **(a)** and in *K5VP16;Pparg* mutants **(g)**. Oil-Red-O staining in controls **(b)** and in *K5VP16;Pparg* mutants **(h)** 1 day after Tamoxifen induction. Expression of Pparg and Krt14 in controls **(c)** and in *K5VP16;Pparg* mutants **(i)** 4 days after Tamoxifen induction. Oil-Red-O staining in controls **(d)** and in *K5VP16;Pparg* mutants **(j)** 4 days after Tamoxifen induction. Pparg and Krt14 expression in controls **(e)** and in *K5VP16;Pparg* mutants **(k)** 1 month after Tamoxifen induction. Oil-Red-O staining of controls **(f)** and mutants **(l)** 1 month after induction. Expression of Pparg, Gfp, and Fabp4 1 day after Tamoxifen induction in *K5;mTmG* controls **(m)** and in *K5VP16;Pparg;mTmG* mutants **(q)**. Expression of Pparg, Gfp, and Fabp4 4 days after Tamoxifen induction in *K5;mTmG* controls **(n)** and in *K5VP16;Pparg;mTmG* mutants **(r)**. Expression of Gfp and Fabp4 1 month after Tamoxifen induction in *K5;mTmG* controls **(o)** and *K5VP16;Pparg;mTmG* mutants **(s)**. Higher magnification image showing expression of Gfp 1 month after Tamoxifen induction in *K5;mTmG* controls **(p)** and *K5VP16;Pparg;mTmG* mutants **(t)**. Yellow arrows denote Gfp-positive control basal cells. White arrows denote Gfp-positive mutant cells expressing the transgene. Expression of Krt5 and Krt14 4 days after Tamoxifen induction in *VP16;Pparg<sup>fl/fl</sup>* controls **(u)** and *K5VP16;Pparg* mutants **(w)**. Expression of Krt5 4 days after Tamoxifen induction in controls **(v)** and in *K5VP16;Pparg* mutants **(x)** Yellow arrows denote control basal cells. White arrows denote mutant basal cells losing Krt5 expression. **(y)** Table showing the luminal/basal gene signature in based on RNA-seq analysis of urothelium from *K5;mTmG* controls and *K5VP16;Pparg* mutants 4 days post-Tamoxifen induction. **(z)** mRNA expression showing increased expression of genes involved in RA signaling in *K5VP16;Pparg;mTmG* mutants (n=3) compared to controls (n=3) 4 days after Tamoxifen induction. Box plots display minima, maxima, and interquartile range (IQR). Significance was calculated by one-sided Mann-Whitney U test (aldh1a2 p=0.67, aldh1a3 p=0.0059, rbp4 p=0.00061, rdh11 p=0.00032, crabp2 p=0.00032, stra6 p=0.036). ns=not significant; \*p≤0.05; \*\*0.05 ≤p≤0.01; \*\*\*0.01 ≤p≤0.0001. Scale bars, 50 μm.

# Supplementary Fig. 2

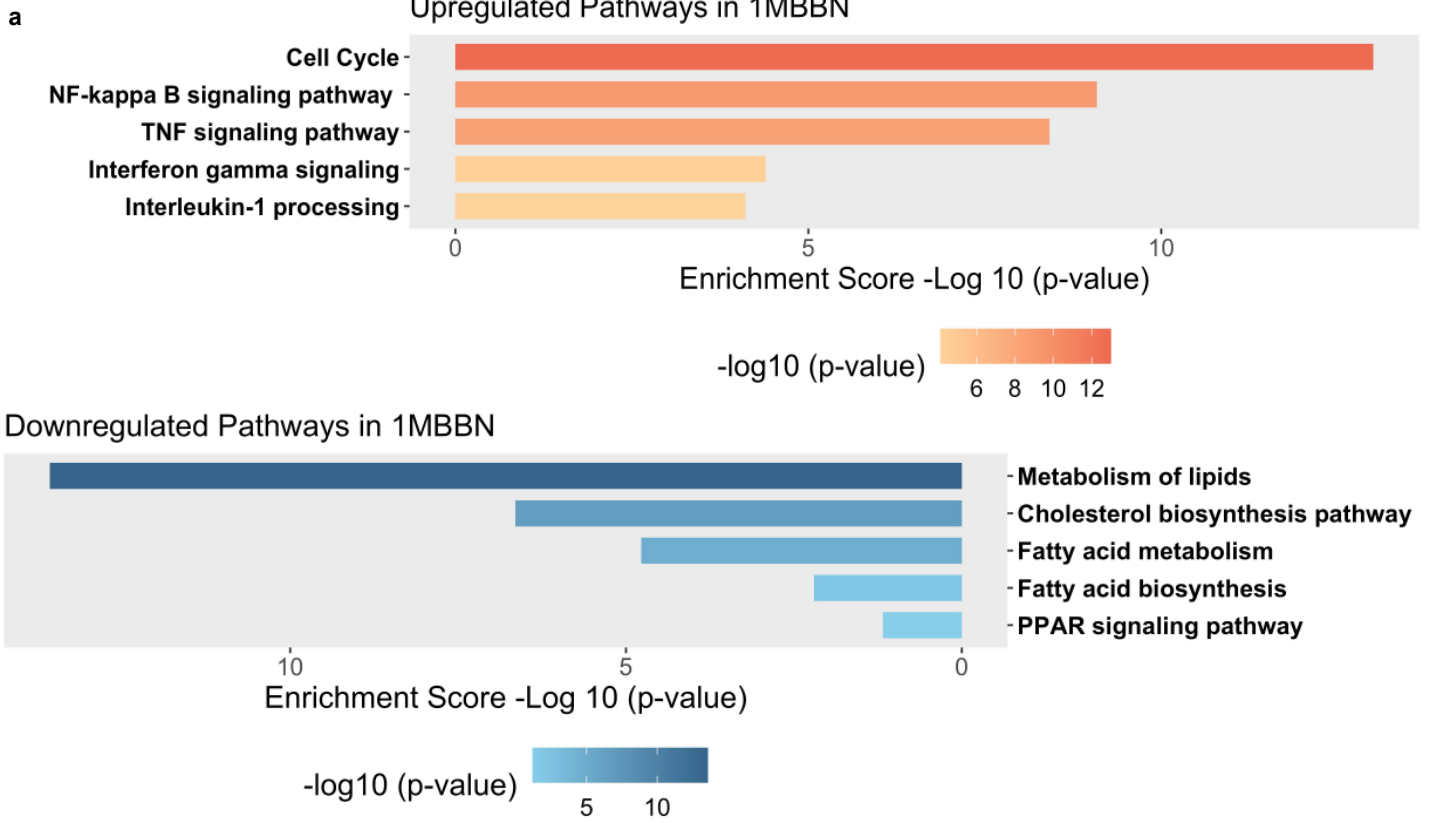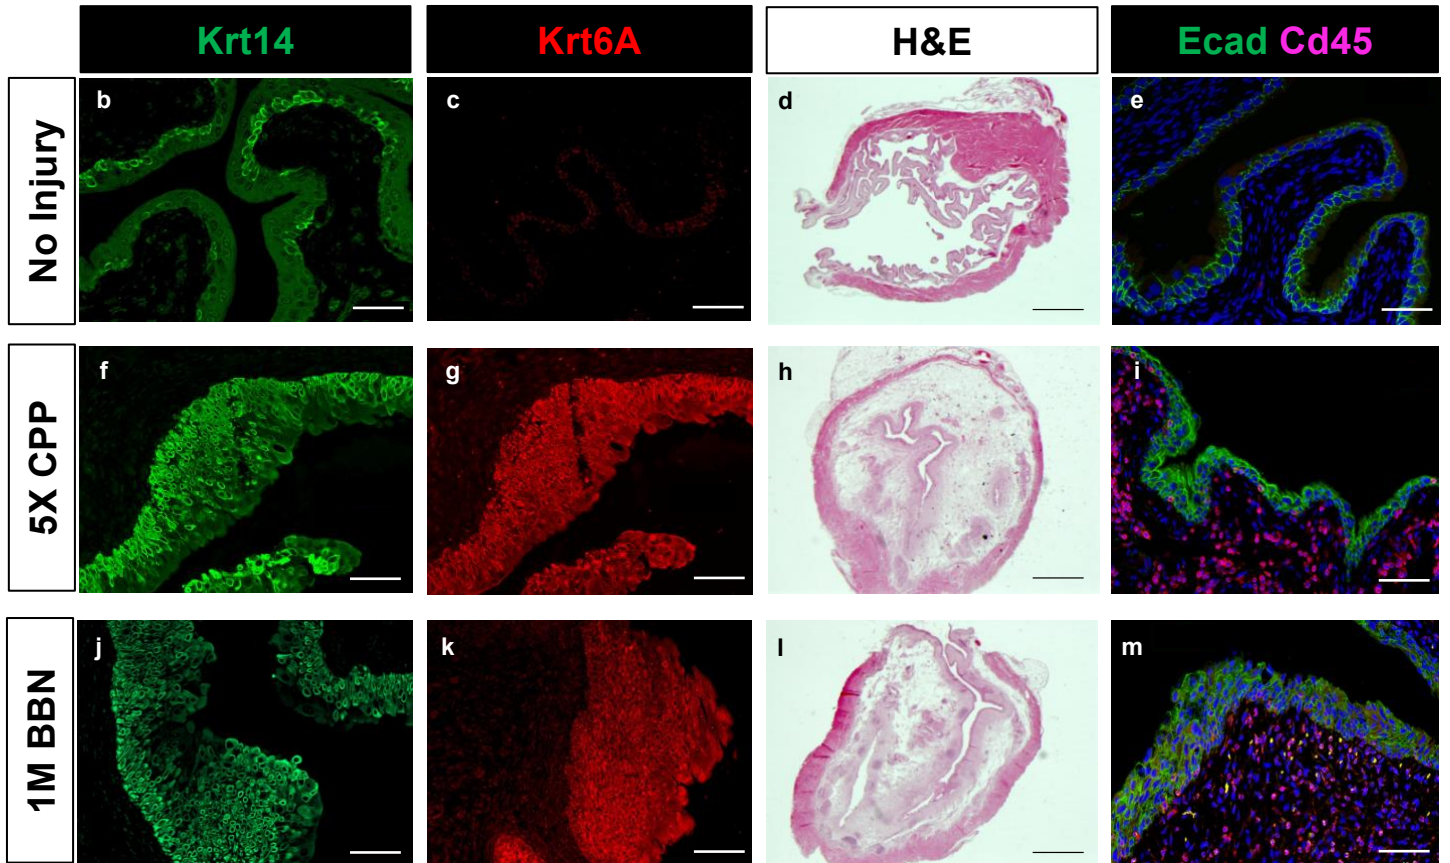

**Supplementary Fig. 2. (a)** Up-regulated and down-regulated pathways from RNA-seq analysis of controls and bladders after 1MBBN treatment. p-values were calculated by hypergeometric test and corrected for multiple testing. **(b-m)** Repeated CPP treatment induces a similar activation program in the urothelium as that induced by 1M of BBN treatment. **(b,f,j)** Expression of Krt14 in controls **(b)**, animals treated with 5X CPP **(f)** and animals treated with BBN for 1 month **(j)**. **(c,g,k)** Expression of Krt6A in controls **(c)**, animals treated with 5X CPP **(g)**, and animals treated with BBN for 1 month **(k)**. H&E staining of bladders from controls **(d)**, from animals treated with 5X CPP **(h)**, and from animals treated with BBN for 1 month **(l)**. **(e,i,m)** E-cadherin and Cd45 expression in controls **(e)**, in animals treated with 5X CPP **(i)** and in animals after 1 month of BBN treatment **(m)**. Scale bars in **(b,c,e,f,g,l,j,k,m)** 50  $\mu\text{m}$ . Scale bars in **(d,h,l)** 200  $\mu\text{m}$ .



### Supplementary Figure 3

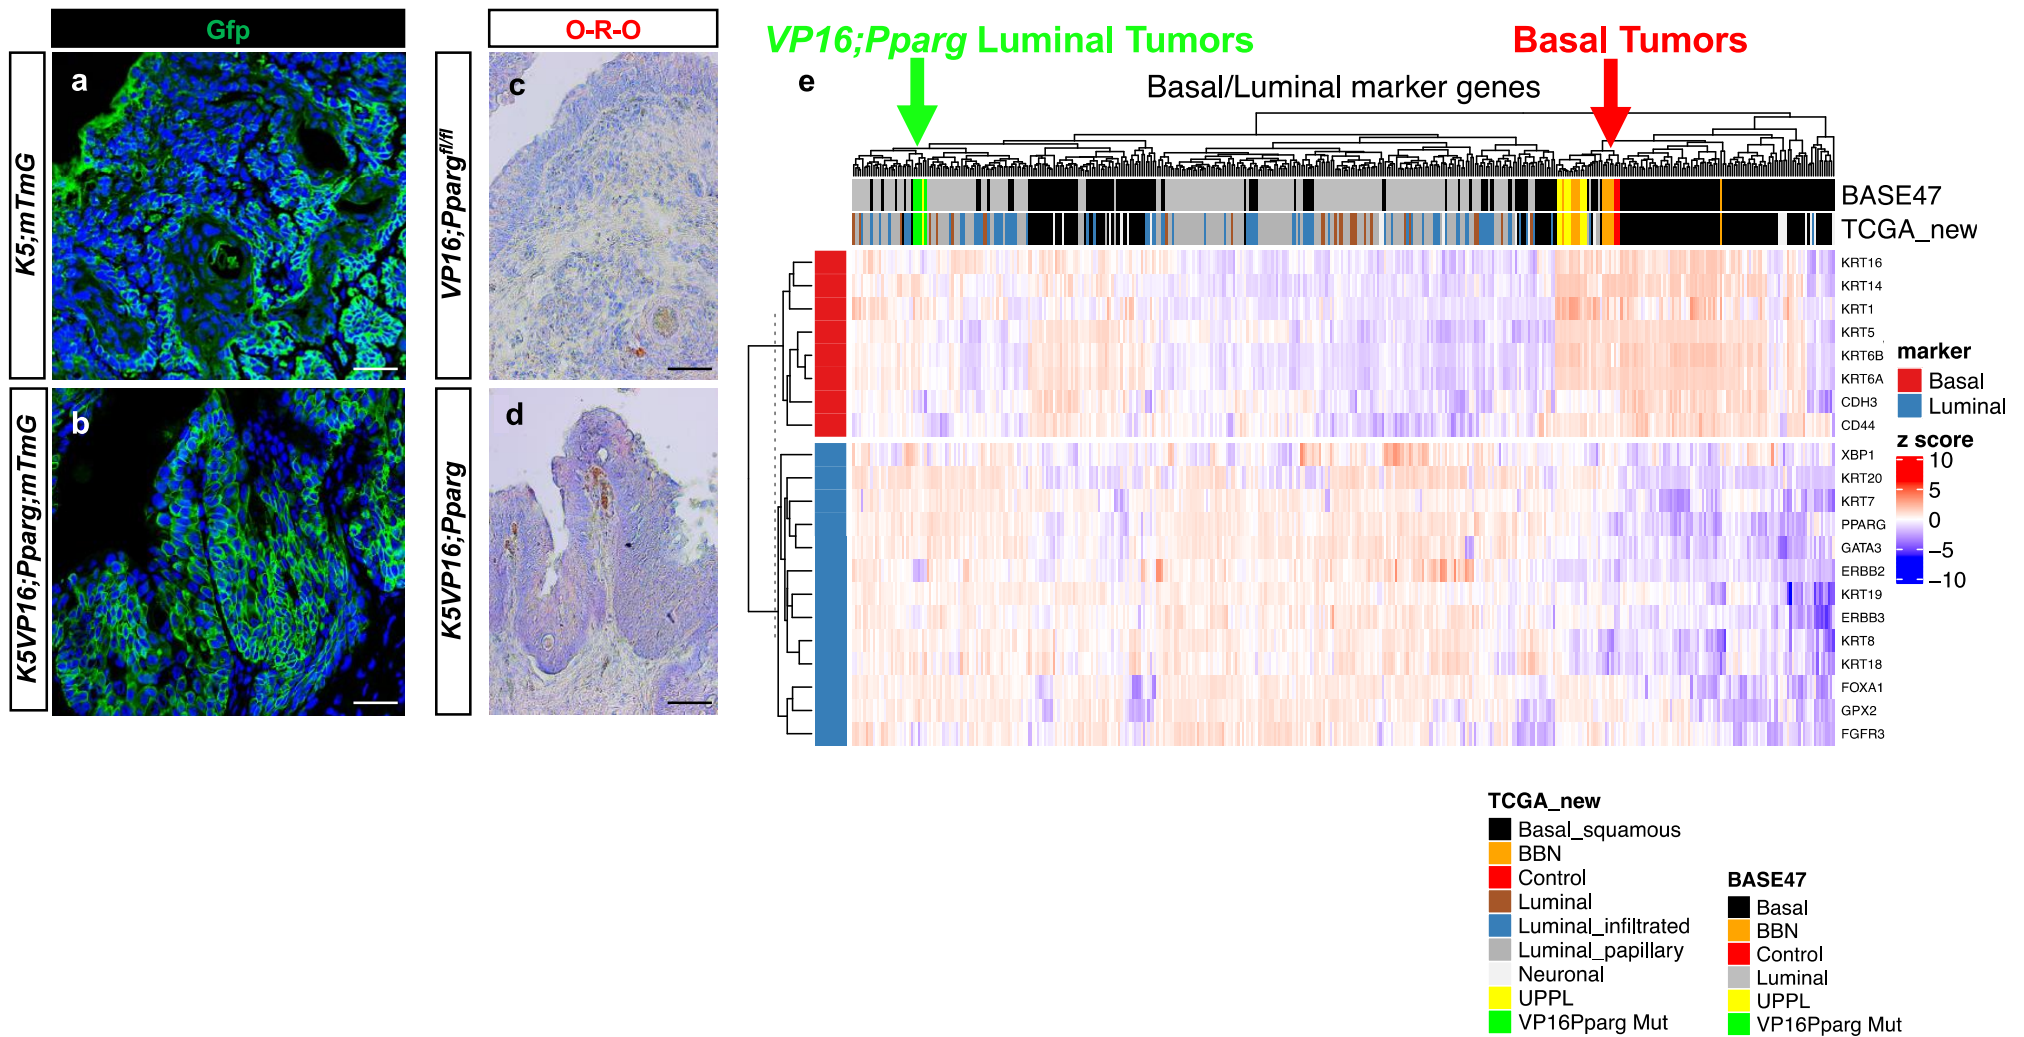

**Supplementary Fig. 3.** (a,b) Lineage tracing showing expression of Gfp-labeled basal cells and their daughters in a *K5;mTmG* control tumor (a) and in a *K5VP16;Pparg;mTmG* mutant tumor (b). Oil-Red-O staining of a *VP16;Pparg<sup>fl/fl</sup>* control tumor (c) and *K5VP16;Pparg* mutant tumor (d) 4 months after Tamoxifen induction. (e) Heatmap showing co-clustering of tumors from *K5;mTmG* controls and *K5VP16;Pparg* mutant tumors with luminal and basal tumors respectively. Data includes the TCGA BLCA data set, BASE47 base classifier data set, BBN treated tumors and UPPL tumors. Scale bars 50 $\mu$ m.

# Supplementary Fig. 4

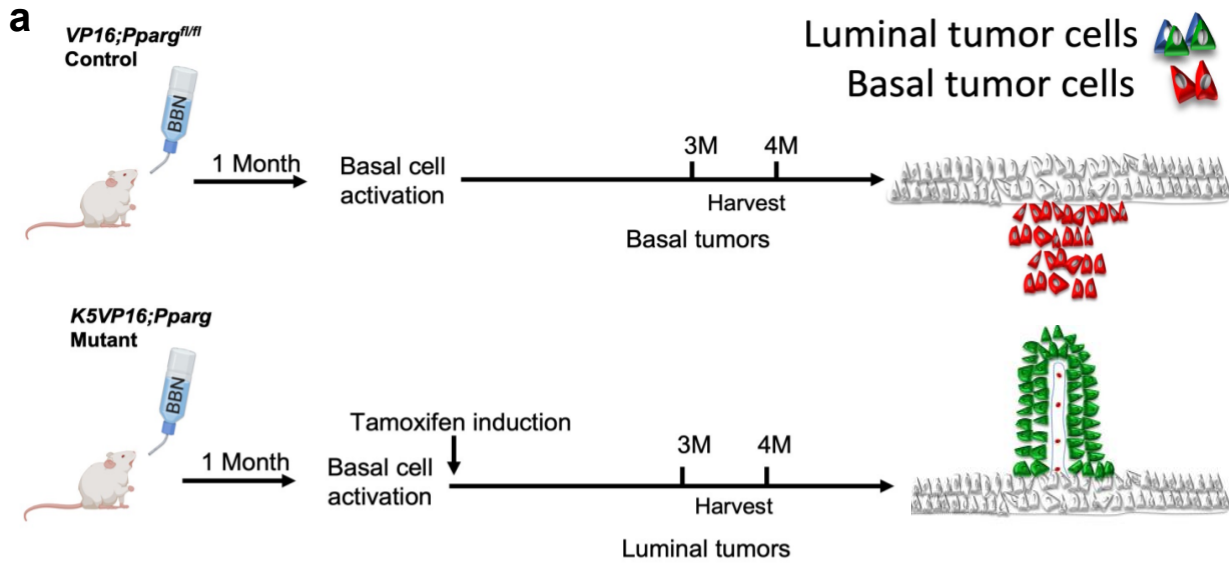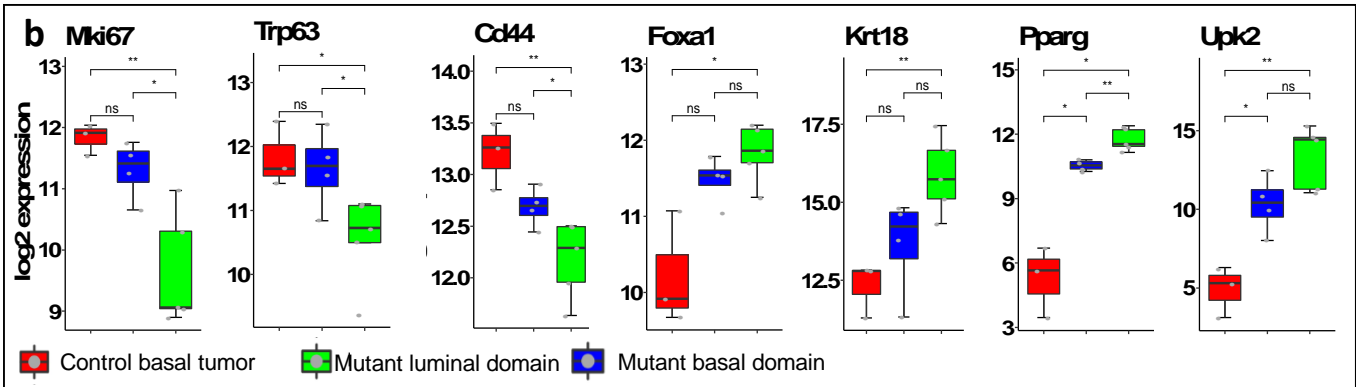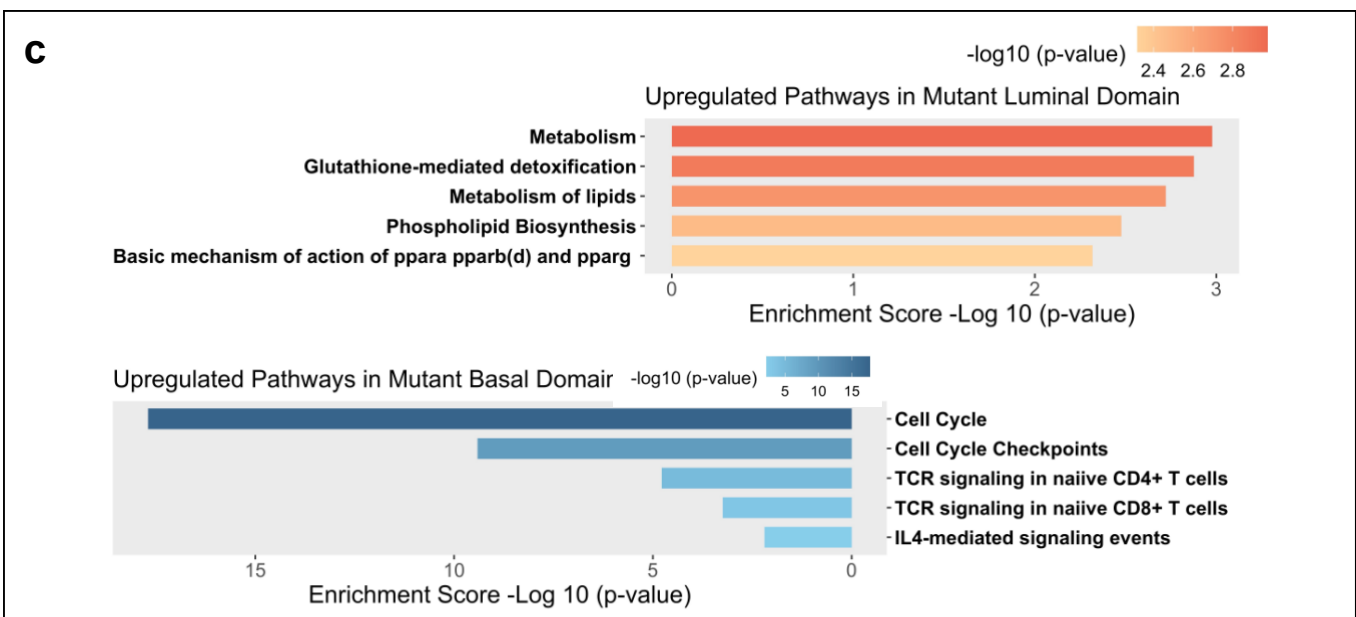

**Supplementary Fig. 4. (a)** Schematic of luminal and basal tumor formation in *K5;mTmG* controls and *K5VP16;Pparg;mTmG* mutants, respectively. **(b)** Expression levels mRNA encoding *Mki67*, *Trp63*, *Cd44*, *Foxa1*, *Krt18*, *Pparg*, and *Upk2* from *K5;mTmG* in basal control tumors (n=3) compared to luminal (n=4) and basal domains (n=4) of *K5VP16;Pparg;mTmG* mutant tumors at 4 months. Box plots display minima, maxima, and interquartile range (IQR). Significance was calculated by Mann-Whitney U test. ns=not significant; \* $p \leq 0.05$ ; \*\* $0.05 \leq p \leq 0.01$ . **(c)** Upregulated and downregulated signaling pathways based on RNA-seq analysis of *K5VP16;Pparg* mutant luminal domain compared to the *K5VP16;Pparg* mutant basal domain at 4 months. p-values were calculated by hypergeometric test and corrected for multiple testing.



# Supplementary Fig. 5

a

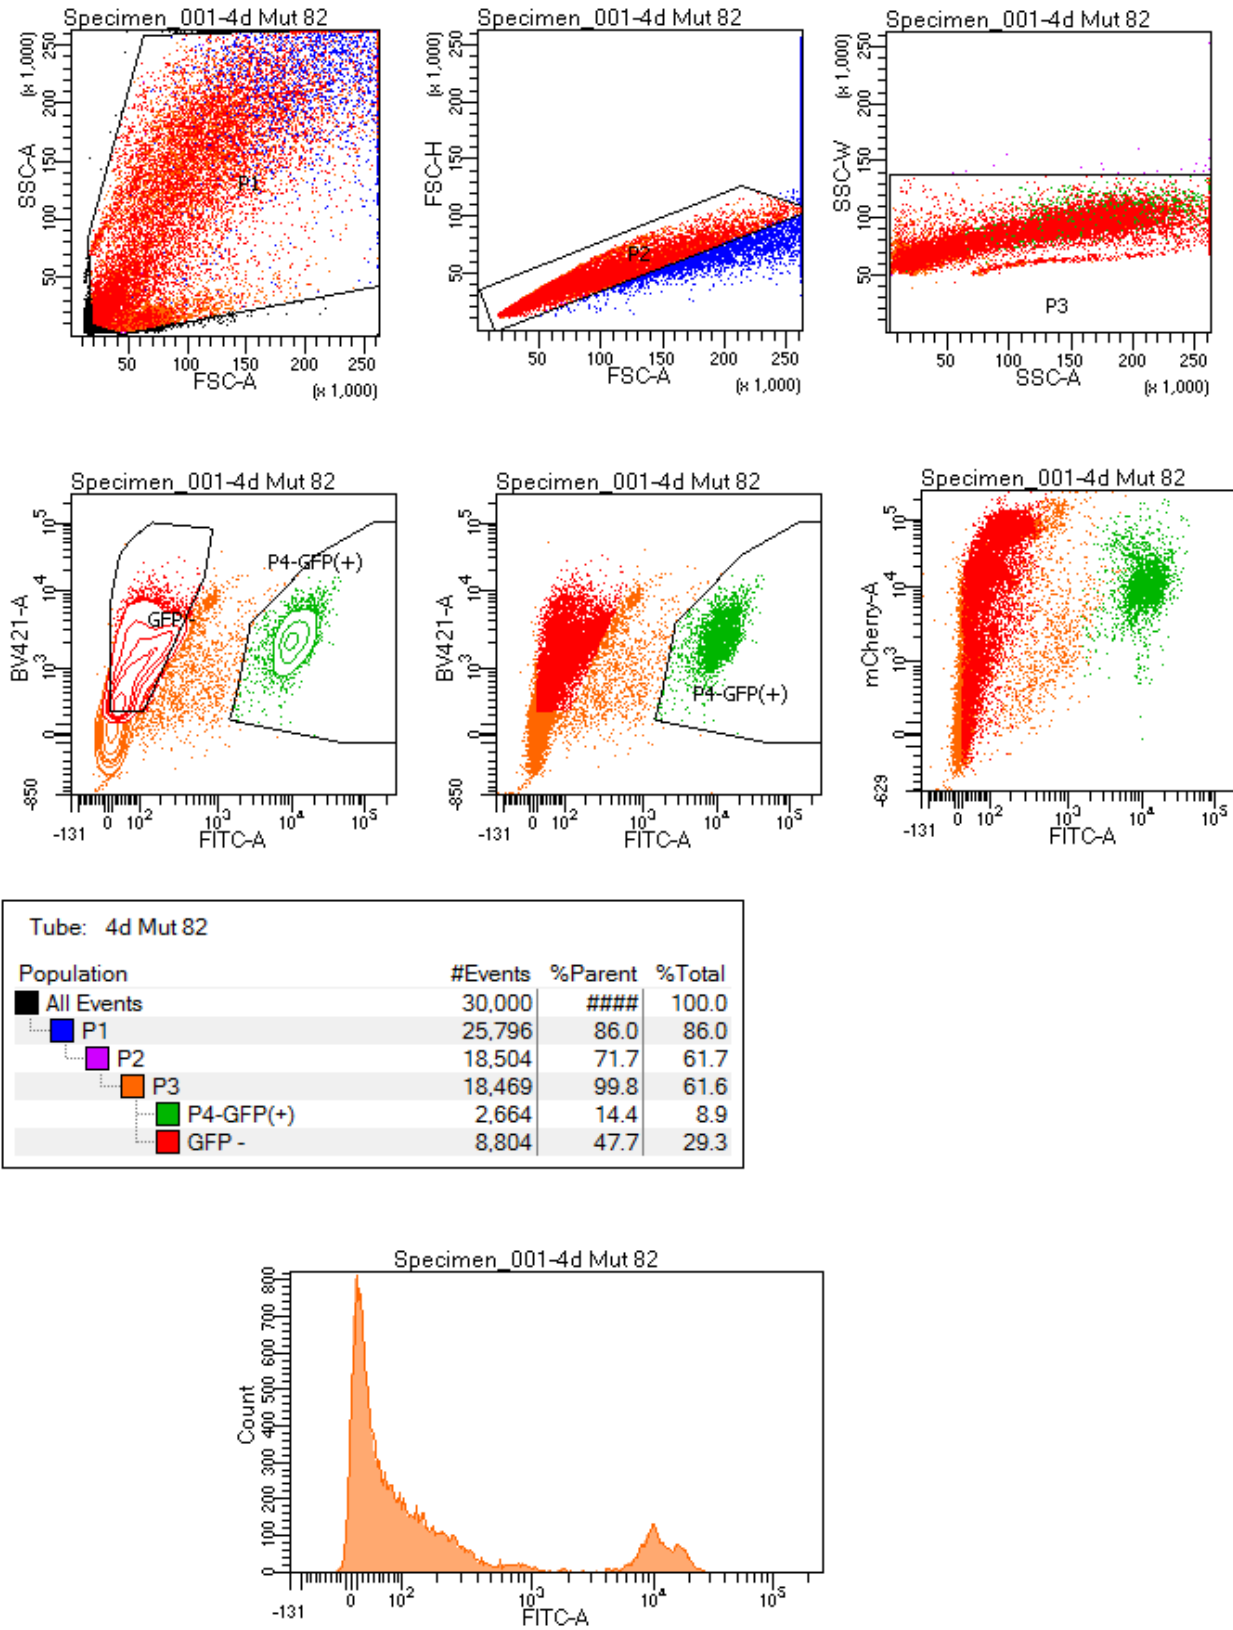

**Supplementary Fig. 5. (a)** Gating strategy used to collect GFP+ cells in homeostatic RNAseq.

**Supplementary Table 1. Key resources used in the study**

| <b>ANTIBODIES</b>                     | <b>SOURCE</b>             | <b>IDENTIFIER</b> | <b>CLONE</b> | <b>DILUTION</b> |
|---------------------------------------|---------------------------|-------------------|--------------|-----------------|
| Chicken Polyclonal Anti-Keratin 14    | Biolegend                 | Cat#906001        | N/A          | 1:400           |
| Chicken Polyclonal Anti-Keratin 5     | Biolegend                 | Cat#905901        | N/A          | 1:400           |
| Rabbit Polyclonal Anti-Krt6A          | LSBio                     | Cat#LS-B12036-100 | N/A          | 1:2000          |
| Mouse Monoclonal Anti-Cytokeratin 20  | AgilentDako               | Cat# M701929-2    |              | 1:200           |
| Rabbit Polyclonal Anti-PPARG          | Cell Signaling Technology | Cat# 2435         | N/A          | 1:200           |
| Goat Polyclonal Anti-FABP4            | R&D Systems               | Cat# AF1443       | N/A          | 1:1000          |
| Mouse Monoclonal Anti-FOXA1           | Seven Hills Bioreagents   | Cat# WMAB-2F83    | 2F83         | 1:1000          |
| Mouse Monoclonal Anti-p21/CDKN1A/WAF1 | LSBio                     | Cat# LS-C389956   | HJ21         | 1:200           |
| Rabbit Polyclonal Anti-p63            | GeneTex                   | Cat#GTX102425     | N/A          | 1:300           |
| Goat Polyclonal Anti-p63              | R&D Systems               | Cat#AF1916        | N/A          | 1:200           |
| Rat Monoclonal Anti-CD45              | BD Bioscience             | Cat#550539        | 30F11        | 1:100           |
| Rabbit Polyclonal Anti-Cytokeratin 18 | Abcam                     | Cat#ab52948       | N/A          | 1:500           |
| Rabbit Polyclonal Anti-Ki67           | Abcam                     | Cat#ab15580       | N/A          | 1:200           |
| Chicken Polyclonal Anti-GFP           | Aves Labs                 | Cat#GFP1020       | N/A          | 1:300           |
| Goat Polyclonal Anti-E-Cadherin       | R&D Systems               | Cat#AF748         | N/A          | 1:400           |

|                                         |                        |                 |     |       |
|-----------------------------------------|------------------------|-----------------|-----|-------|
| Rabbit Polyclonal NFkB p65              | Abcam                  | Cat#AB19870     | N/A | 1:300 |
| Rabbit Polyclonal Laminin               | Sigma                  | Cat#L9393       | N/A | 1:100 |
| Mouse Monoclonal SMA-CY3                | Sigma                  | Cat#C6198       | 1A4 | 1:500 |
| Alexa Fluor 488 Donkey Anti-Rabbit IgG  | Jackson Immunoresearch | Cat#711-545-152 | N/A | 1:700 |
| Alexa Fluor 488 Donkey Anti-Mouse IgG   | Jackson Immunoresearch | Cat#711-545-150 | N/A | 1:700 |
| Alexa Fluor 488 Donkey Anti-Chicken IgG | Jackson Immunoresearch | Cat#703-545-155 | N/A | 1:700 |
| Alexa Fluor 488 Donkey Anti-Goat IgG    | Jackson Immunoresearch | Cat#705-545-003 | N/A | 1:700 |
| Cy3 Donkey Anti-Rabbit IgG              | Jackson Immunoresearch | Cat#711-165-152 | N/A | 1:700 |
| Alexa Fluor 594 Donkey Anti-Mouse IgG   | Jackson Immunoresearch | Cat#715-585-151 | N/A | 1:700 |
| Alexa Fluor 594 Donkey Anti-Chicken IgG | Jackson Immunoresearch | Cat#703-585-155 | N/A | 1:700 |
| Alexa Fluor 594 Donkey Anti-Goat IgG    | Jackson Immunoresearch | Cat#705-585-147 | N/A | 1:700 |
| Alexa Fluor 647 Donkey Anti-Mouse IgG   | Jackson Immunoresearch | Cat#715-605-150 | N/A | 1:400 |
| Alexa Fluor 647 Donkey Anti-Rabbit IgG  | Jackson Immunoresearch | Cat#711-605-152 | N/A | 1:400 |
| Alexa Fluor 647 Donkey Anti-Chicken IgG | Jackson Immunoresearch | Cat#703-605-155 | N/A | 1:400 |
| Alexa Fluor 647 Donkey Anti-Goat IgG    | Jackson Immunoresearch | Cat#705-605-003 | N/A | 1:400 |

| REAGENT or RESOURCE          | SOURCE                                    | IDENTIFIER |
|------------------------------|-------------------------------------------|------------|
| <b>Biological samples</b>    |                                           |            |
| Human bladder tumors samples | Columbia University Irving Medical Center | N/A        |

| <b>Chemicals, Peptides, and Recombinant proteins</b> |                          |                 |
|------------------------------------------------------|--------------------------|-----------------|
| N-butyl-N-(4-hydroxybutyl) nitrosamine               | Sigma                    | Cat#B8061-1G    |
| Hank's Balanced Salt Solution (HBSS)                 | ThermoFisher Scientific  | Cat#14170-112   |
| Bovine Serum Albumin                                 | Sigma                    | Cat#A2058       |
| <i>Bacillus licheniformis</i> protease               | Sigma                    | Cat#P5459       |
| CaCl <sub>2</sub>                                    | Sigma                    | Cat#21115       |
| DNase I recombinant                                  | Sigma                    | Cat#4716728001  |
| RLT lysis buffer                                     | Qiagen                   | Cat#1015750     |
| Antigen unmasking solution                           | Vector Labs              | Cat#H3300       |
| Citrate buffer                                       | Thermo Fisher Scientific | Cat#AP-9003-500 |
| Horse Serum, heat inactivated                        | Gibco                    | Cat#26050070    |
| Tween80                                              | Sigma                    | Cat#P1754       |
| DMEM/F12                                             | Thermo Fisher Scientific | Cat#H7904       |
| 4-Hydroxytamoxifen                                   | Sigma                    | Cat#11320033    |
| Tamoxifen                                            | Sigma                    | Cat#T5648       |
| Histogene Staining Solution                          | TherFisher Scientific    | Cat#KIT0425     |
| <b>Critical commercial assays</b>                    |                          |                 |
| SMART-Seq v4 Ultra Low Input RNA Kit for Sequencing  | TaKaRa                   | Cat#634889      |
| <b>Deposited data</b>                                |                          |                 |

|                                                                                                                                                                                                                                                           |                          |                |
|-----------------------------------------------------------------------------------------------------------------------------------------------------------------------------------------------------------------------------------------------------------|--------------------------|----------------|
| Raw RNA-seq files                                                                                                                                                                                                                                         | This paper               | GEO: GSE172656 |
| <b>Experimental Models: Organisms/Strains</b>                                                                                                                                                                                                             |                          |                |
| Mouse: <i>VP16;Pparg</i>                                                                                                                                                                                                                                  | This paper               |                |
| Mouse: <i>mTmGfl/fl</i> (Gt(ROSA)26Sortm4(ACTB-tdTomato,-EGFP)Luo/J)                                                                                                                                                                                      | Jackson Laboratory       | Cat#007576     |
| Mouse: FVB.Cg-Tg(KRT5-cre/ERT2)2lpc/JelJ (K5Cre <sup>ERT2</sup> )                                                                                                                                                                                         | D. Metzger<br>P. Chambon | N/A            |
| <b>Oligonucleotides</b>                                                                                                                                                                                                                                   |                          |                |
| Primer: <i>VP16;Pparg</i><br><br>Mutant forward: 5'-CTGCATTCTAGTTGTGGTTTGTCCA-3'<br><br>Mutant reverse:5'-ATCGGTAAACATCTGCTCAAACCTCG-3'<br><br>Wild type forward 5'-CCCAAAGTCGCTCTGAGTTGTTATC-3'<br><br>Wild type reverse 5'-AACTCGGGTGAGCATGTCTTTAATC-3' | This paper               | N/A            |
| Primer: <i>Krt5Cre<sup>ERT2</sup></i><br><br>Forward: 5'-ATTTGCCTGCATTACCGGTC-3'<br><br>Reverse: 5'-ATCAACGTTTTGTTTTCGGA-3'                                                                                                                               | Indira et al, 1999       | NA             |
| Primer: <i>mTmG</i>                                                                                                                                                                                                                                       | Muzumdar et al, 2007     | NA             |



|                                                                             |                          |                                                                                                     |
|-----------------------------------------------------------------------------|--------------------------|-----------------------------------------------------------------------------------------------------|
| Common 5'-CTCTGCTGCCTCCTGGCTTCT-3'                                          |                          |                                                                                                     |
| Mutant 5'-TCAATGGGCGGGGGTCGTT-3'                                            |                          |                                                                                                     |
| Wild type 5'-CGAGGCGGATCACAAGCAATA-3'                                       |                          |                                                                                                     |
| <b>Software and Algorithms</b>                                              |                          |                                                                                                     |
| R version 4.0.4                                                             | R Core Team, 2016        | <a href="http://www.r-project.org/">http://www.r-project.org/</a>                                   |
| DESeq2                                                                      | Love et al., 2014        | <a href="https://github.com/mikelove/DESeq2">https://github.com/mikelove/DESeq2</a>                 |
| Gene Set Enrichment Analysis, v4.1.0                                        | Subramanian et al., 2005 | <a href="https://www.gsea-msigdb.org/gsea/index.jsp">https://www.gsea-msigdb.org/gsea/index.jsp</a> |
| <b>Other</b>                                                                |                          |                                                                                                     |
| VEVO 3100Ultrasound Imaging System                                          | FUJIFILM VisualSonics    | N/A                                                                                                 |
| Zeiss AxioObserver.Z1 inverted microscope for laser capture microdissection | Zeiss                    | N/A                                                                                                 |
